# Supplementary material
Source: publisher figshare collection journal article supplement (https://geolsoc.figshare.com/ndownloader/files/31136342)
Supplement: Supplementary file 1 [file 31136342]

## Sheet: Obs and stats
DR X
VARIOUS NUMERICAL OBSERVATIONS ON SILLS AND DYKES IN HURRY INLET, JAMESON LAND. FOR QUESTIONS, CONTACT CHRISTIAN.EIDE@UIB.no. For details see FIG 3A
Median thikness of all sills across outcrop	19.701	m
Median height of outcrop exposed:	206.565	m
Degree of vertical inflation:	0.0953743
	Thickness of every sill, measured vertically every 1 km from Log E/6
Distance from southernmost point on outcrop to LOG E	3207	m																								26654				BOX3:: Dyke obs and stats
Comments										thickest sill splits after 1 m			Upper sill is above outcrop																	All dykes observed in outcrops from below outcrop
BOX1: Statistics on all encountered sills, based on data in grey box below (BOX2)
Location name			LOG E										Albuen
Measurement location, #	-3	-2	-1	0	1	2	3	4	5	6	7	8	9	10	11	12	13	13.888	15	16	17	18	19	20	21					DYKES	Only vertical ones from below outcrop, not sloping connected to sills
Distance from southernmost point of outcrop	207	1207	2207	3207	4207	5207	6207	7207	8207	9207	10207	11207	12207	13207	14207	15207	16207	17095	18207	19207	20207	21207	22207	23207	25000	26654	27500	32000		X (From LOG1	X from edge of outcrop	Width	Stats	Stats	Distance to prev
Total vertical outcrop thickness (m)	200	165.768	146.603	193.464	180	159.149	112.811	181.993	164.809	165.887	138.006	213	251.224	268	293.62	394.073	240.186	206.565	234	280.652	232.639	207	200	200	200	200	200	200		-1211	1996	9.547
Total thickness of sills at measurement location	0	12.193	16.702	15.804	10.511	19.701	3.761	23.751	23.36	19.378	20.906	18.551	10.123	7.956	29.186	20.047	20.613	19.986	23.218	23.081	19.784	8.9	0	0	0	4.458	0	0		736	3943	2.998			1947
Ratio of intrusions to host-rock in section	0	0.0735546	0.113927	0.0816896	0.0583944	0.12379	0.0333389	0.130505	0.14174	0.116814	0.151486	0.0870939	0.0402947	0.0296866	0.0994006	0.0508713	0.085821	0.096754	0.0992222	0.0822406	0.0850416	0.0429952	0	0	0	0				908.664	4115.66	1.5071			172.664
Max sill thickness in measurement location	0	9.033	14.164	11.174	8.68	13.082	1.521	8.962	9.272	8.901	16.936	9.391	9.202	7.956	11.305	10.493	10.719	9.34	9.253	9.584	11.526	8.9	0	0	0	0				1908.53	5115.53	1.981			999.863
Average sill thickness at measurement location	0	4.06433	5.56733	2.634	2.62775	3.9402	0.626833	2.96887	3.33714	3.22967	4.1812	9.2755	5.0615	7.956	5.8372	6.68233	4.1226	4.9965	5.8045	7.69367	9.892	8.9	0	0	0	0				3930	7137	1.138			2021.47
Median sill thikness at at measurement location	0	2.365	1.635	1.049	0.711	1.854	0.538	1.0355	1.441	1.0145	1.048	9.2755	5.0615	7.956	4.899	8.05	1.239	4.6995	6.397	8.878	9.892	8.9	0	0	0	0				4468.74	7675.74	1.847			538.743
Minimum measured sill thicknness at at measurement location	0	0.795	0.903	0.55	0.409	1.16	0.153	0.682	0.337	0.336	0.591	9.16	0.921	7.956	1.683	1.504	0.518	1.247	1.171	4.619	8.258	8.9	0	0	0	0				6226.35	9433.35	4.438			1757.61
																														8402	11609	3.18			2175.65
BOX2: Thickness of ALL ENCOUNTERED SILLS, from top of outcrop to bottom (m)																														10534	13741	1.906			2132
Top of outcrop		2.365	14.164	11.174	8.68	1.983	1.521	1.132	1.125	7.732	1.048	9.16	0.921	7.956	11.305	10.493	7.432	7.142	3.703	9.584	11.526	8.9								10878.2	14085.2	1.546			344.211
Thicknesses >5 m highlighted		0.795	0.903	0.786	0.409	1.854	0.364	8.805	1.483	0.38	1.007	9.391	9.202		1.683	1.504	1.239	2.257	9.091	4.619	8.258									11426.5	14633.5	3.68			548.298
to indicate main sills		9.033	1.635	0.973	0.786	13.082	0.153	1.72	0.535	0.964	0.591				4.899	8.05	0.705	1.247	1.171	8.878										11739	14946	2.5527	Dyke Width stats:		312.491
Sills thinner than 1 m not confidentnly mapped				1.125	0.636	1.622	0.503	0.939	0.337	8.901	1.324				1.703		0.518	9.34	9.253											12139	15346	3.0779	sum	58.2567	400	Dyke spacing stats
due to poor exposure				0.55		1.16	0.573	0.695	9.272	0.336	16.936				9.596		10.719													16825.6	20032.6	1.435	min	1.11	4686.65	min	172.664
and are thus underestimated in this dataset				1.196			0.647	8.962	9.167	1.065																				21307.1	24514.1	9.07	average	3.23648	4481.42	average	1685.24
								0.682	1.441																					21843	25050	5.2	median	2.29785	535.938	median	1423
Base of outcrop								0.816																						23266	26473	1.11	max	9.547	1423	max	4686.65
																														27438	30645	2.043	count:	18	4172	count:	17
	BOX4: Dyke width, sorted and classified						BOX5: Thickness proportion of sill types
		Sorted measurements
	Coalesced	16.936		COUNT	85		Sum z in groups																							Total horizontal outcrop W (m)		31297
	Coalesced	14.164		max	16.936		Thin splays	53.107	0.140856	0.140856												0								Total w of dykes		58.2567
	Coalesced	13.082		avg	4.32367		Thinned main sills	13.221	0.0350662													0.5								Ratio of intrusions in outcrop		0.00186141
	Main	11.526		median	1.622		Main sills	266.52	0.706893	0.859144												1								Max W observed		9.547
	Main	11.305		min	0.153		Coalesced main sills	44.182	0.117184													1.5								Average w observed		3.23648
	Main	11.174					Sum z in groups	377.03	1	1												2								Median w observed		2.29785
	Main	10.719																				2.5								Min w observed		1.11
	Main	10.493																				3								Number of sills		18
	Main	9.596																				3.5								Width proportion of wide dykes:		0.319568
	Main	9.584																				4
	Main	9.391																				4.5
	Main	9.34																				5
	Main	9.272																				5.5						BOX5: SILL LENGTH DATA BY STRAT UNIT
	Main	9.253																				6						MAX DISTANCE BEFORE TRANSGRESSION:
	Main	9.202																				6.5						Member	Max sill length	Homogeneous SST	Heterolithic	Poorly cemented SST	Mudstone
	Main	9.167																				7						Trefjord Bjerg Mbr.	0.23	0.23
	Main	9.16																				7.5						Skævdal Mbr.	1.7			1.7
	Main	9.091																				8						Lepidopteriselv Mbr.	0.4	0.4
	Main	9.033																				8.5						Nathorst Fjeld Mbr.	2.9				2.9
	Main	8.962																				9						Astartekløft Mbr	0.85		0.85
	Main	8.901																				9.5						Albuen Mbr.	6				6
	Main	8.9																				10						Elis Bjerg Mbr.	1.3		1.3
	Main	8.878																				10.5
	Main	8.805																				11
	Main	8.68																				11.5
	Main	8.258																				12
	Main	8.05																				12.5
	Main	7.956		9.1255																		13
	Main	7.732																				13.5
	Main	7.432																				14
	Main	7.142																				14.5
	Thinned main	4.899																				15
	Thinned main	4.619																				15.5
	Thinned main	3.703																				16
	Thin splays	2.365																				16.5
	Thin splays	2.257																				17
	Thin splays	1.983																				17.5
	Thin splays	1.854																				18
	Thin splays	1.72																				18.5
	Thin splays	1.703																				19
	Thin splays	1.683																				19.5
	Thin splays	1.635																				20
	Thin splays	1.622
	Thin splays	1.521
	Thin splays	1.504
	Thin splays	1.483
	Thin splays	1.441
	Thin splays	1.324
	Thin splays	1.247
	Thin splays	1.239
	Thin splays	1.196
	Thin splays	1.171
	Thin splays	1.16
	Thin splays	1.132
	Thin splays	1.125
	Thin splays	1.125
	Thin splays	1.065
	Thin splays	1.048
	Thin splays	1.007
	Thin splays	0.973
	Thin splays	0.964
	Thin splays	0.939
	Thin splays	0.921
	Thin splays	0.903
	Thin splays	0.816
	Thin splays	0.795
	Thin splays	0.786
	Thin splays	0.786
	Thin splays	0.705
	Thin splays	0.695
	Thin splays	0.682															Sill splays thinner than 1 m not confiendlty mapped
	Thin splays	0.647
	Thin splays	0.636
	Thin splays	0.591
	Thin splays	0.573
	Thin splays	0.55
	Thin splays	0.535
	Thin splays	0.518
	Thin splays	0.503
	Thin splays	0.409
	Thin splays	0.38
	Thin splays	0.364
	Thin splays	0.337
	Thin splays	0.336
	Thin splays	0.153

## Sheet: Sill thickness histo
Bin	Frequency
0	0
0.5	6
1	20
1.5	14
2	9
2.5	2
3	0
3.5	0
4	1
4.5	0
5	2
5.5	0
6	0
6.5	0
7	0
7.5	2
8	2
8.5	2
9	6
9.5	9
10	2
10.5	1
11	1
11.5	2
12	1
12.5	0
13	0
13.5	1
14	0
14.5	1
15	0
15.5	0
16	0
16.5	0
17	1
17.5	0
18	0
18.5	0
19	0
19.5	0
20	0

## Sheet: Dyke width histo
Bin	Frequency
0	0
0.5	0
1	0
1.5	3
2	5
2.5	1
3	2
3.5	2
4	1
4.5	1
5	0
5.5	1
6	0
6.5	0
7	0
7.5	0
8	0
8.5	0
9	0
9.5	1
10	1
10.5	0
11	0
11.5	0
12	0
12.5	0
13	0
13.5	0
14	0
14.5	0
15	0
15.5	0
16	0
16.5	0
17	0
17.5	0
18	0
18.5	0
19	0
19.5	0
20	0
More	0

## Sheet: Proportion of sills in lith
0	167904	1		<== brightness values of lithology panel from IMGJ				From asas in image 3A
1	0
2	0	3
3	0
4	0
5	0	6
6	0			Lithology	Gray value	Pixels	Percentage
7	0	8		Mudstone	0	167904	0.578206
8	0			Brittle sandstone	97	22464	0.0773586
9	0			Poorly cemented sandstone	127	25716	0.0885574
10	0			Heterolithic	195	74304	0.255878
11	0			Total		290388	1
12	0
13	0
14	0
15	0
16	0
17	0
18	0
19	0
20	0
21	0
22	0
23	0
24	0
25	0
26	0
27	0
28	0
29	0
30	0
31	0
32	0
33	0
34	0
35	0
36	0
37	0
38	0
39	0
40	0
41	0
42	0
43	0
44	0
45	0
46	0
47	0
48	0
49	0
50	0
51	0
52	0
53	0
54	0
55	240
56	0
57	0
58	0
59	0
60	0
61	0
62	0
63	0
64	0
65	0
66	0
67	0
68	0
69	0
70	4
71	0
72	0
73	0
74	2
75	0
76	0
77	0
78	0
79	0
80	0
81	0
82	0
83	0
84	0
85	0
86	0
87	0
88	0
89	0
90	2
91	0
92	0
93	8
94	0
95	0
96	0
97	22464
98	0
99	8
100	0
101	0
102	0
103	0
104	0
105	0
106	0
107	0
108	0
109	0
110	0
111	798
112	0
113	0
114	0
115	0
116	0
117	0
118	0
119	0
120	0
121	0
122	0
123	0
124	3642
125	0
126	0
127	25716
128	0
129	0
130	258
131	0
132	0
133	0
134	0
135	0
136	0
137	0
138	0
139	0
140	0
141	0
142	0
143	4
144	0
145	0
146	0
147	0
148	0
149	0
150	0
151	0
152	0
153	0
154	0
155	4
156	0
157	0
158	0
159	66
160	0
161	0
162	0
163	0
164	0
165	0
166	0
167	0
168	4
169	0
170	0
171	0
172	0
173	0
174	4
175	0
176	0
177	0
178	0
179	0
180	0
181	0
182	8
183	14
184	0
185	0
186	0
187	6
188	0
189	0
190	0
191	8
192	0
193	0
194	0
195	74304	74304	195
196	0	8480484	255
197	0
198	0
199	0
200	0
201	0
202	0
203	0
204	0
205	0
206	0
207	14
208	0
209	0
210	0
211	0
212	0
213	0
214	0
215	0
216	0
217	0
218	0
219	0
220	0
221	0
222	0
223	6
224	0
225	0
226	0
227	0
228	0
229	0
230	0
231	0
232	0
233	0
234	0
235	0
236	0
237	0
238	0
239	0
240	0
241	0
242	0
243	0
244	0
245	0
246	0
247	0
248	0
249	0
250	0
251	0
252	0
253	0
254	0
255	8480484	8480484	255
